# Supplementary material for: Controlled intracellular localization and enhanced antisense effect of oligonucleotides by chemical conjugation
Source: Royal Society of Chemistry journal article supplement (doi:10.1039/b507691a), 2005-01-01
Supplement: b507691a.pdf [file b507691a.pdf]

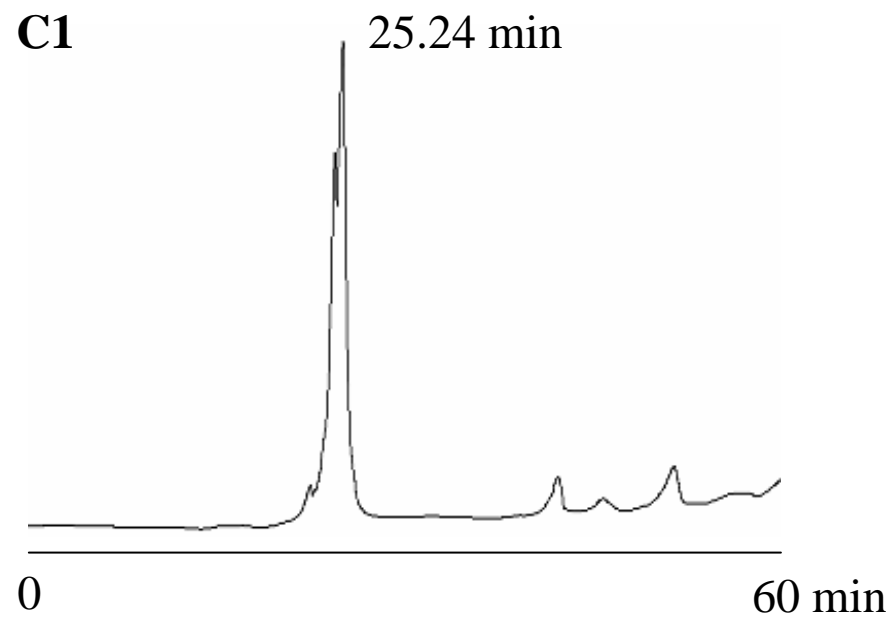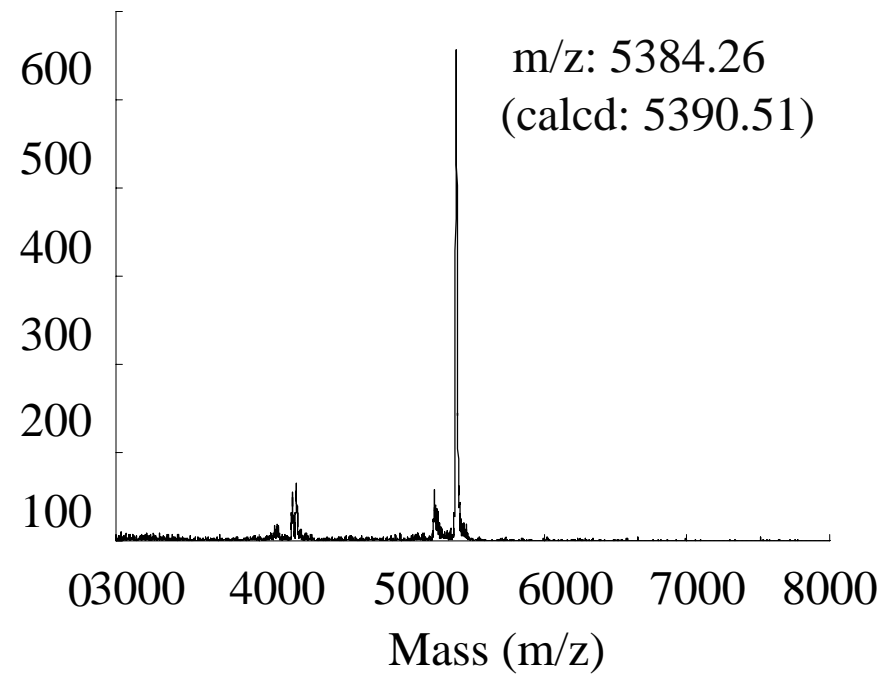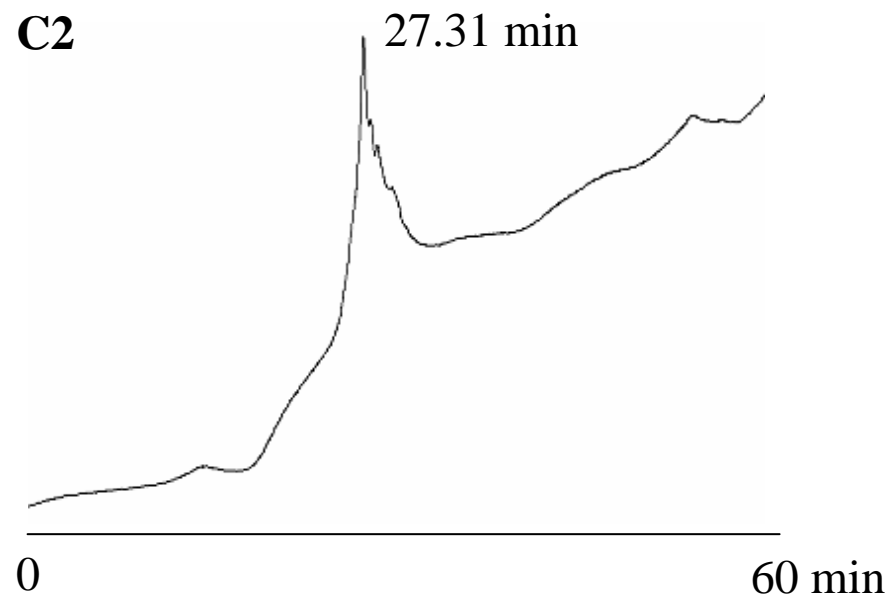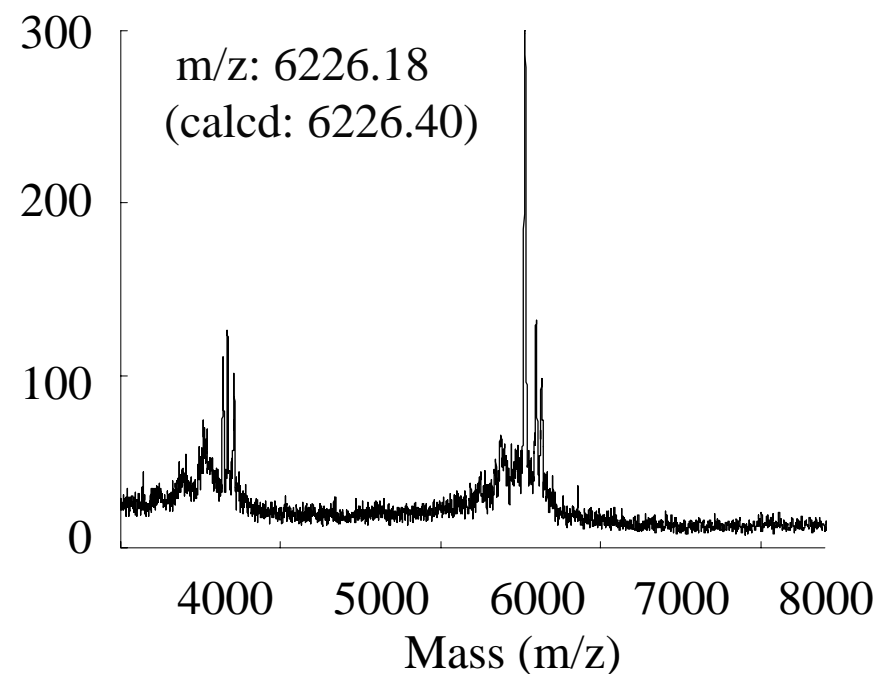

**Fig. 1a. Characterization of Conjugate ODNs (C1 and C2).**

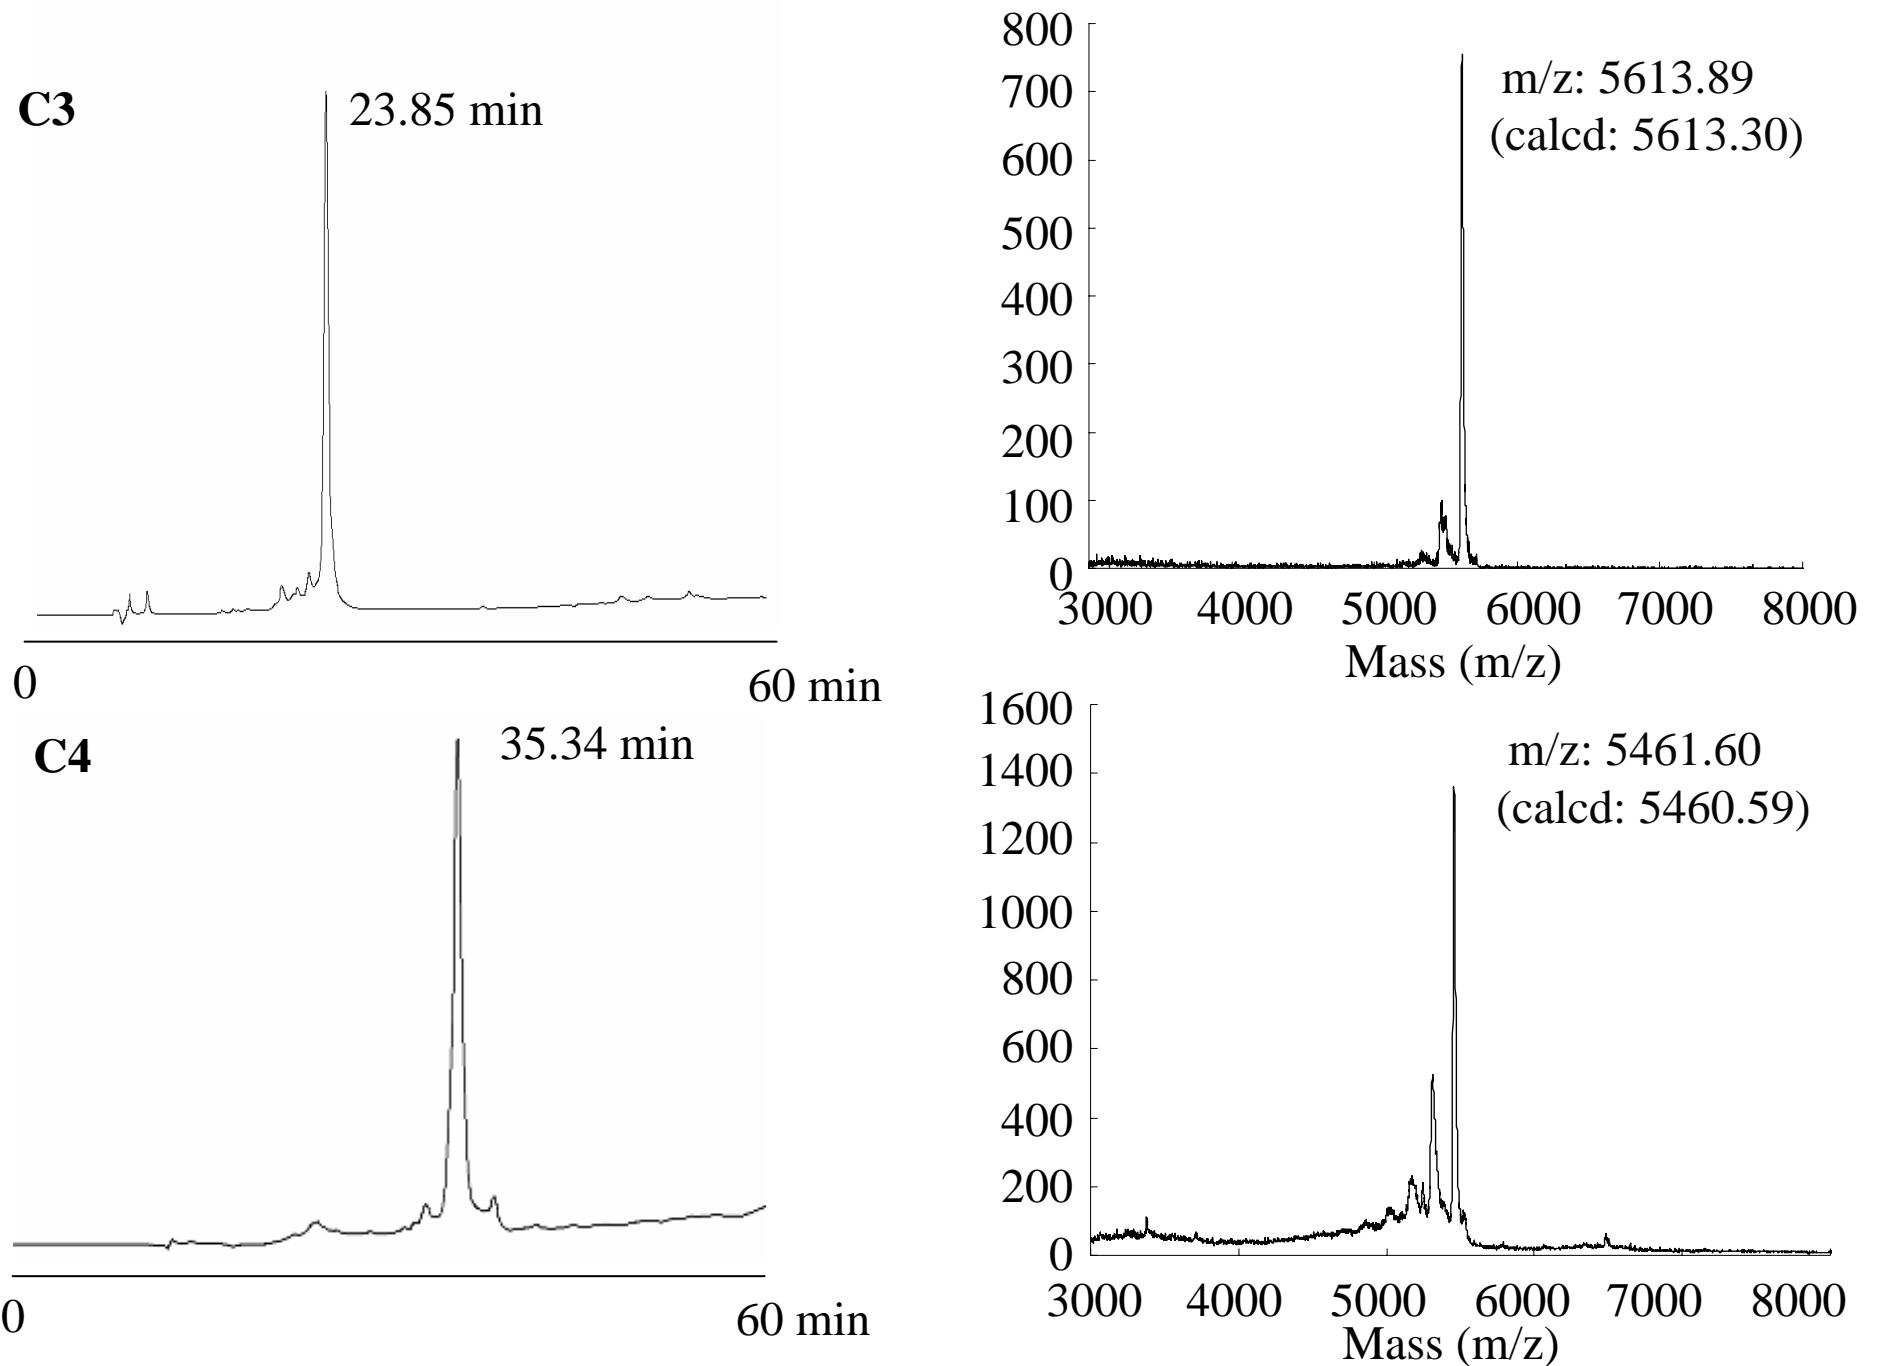

**Fig. 1b. Characterization of Conjugate ODNs (C3 and C4).**

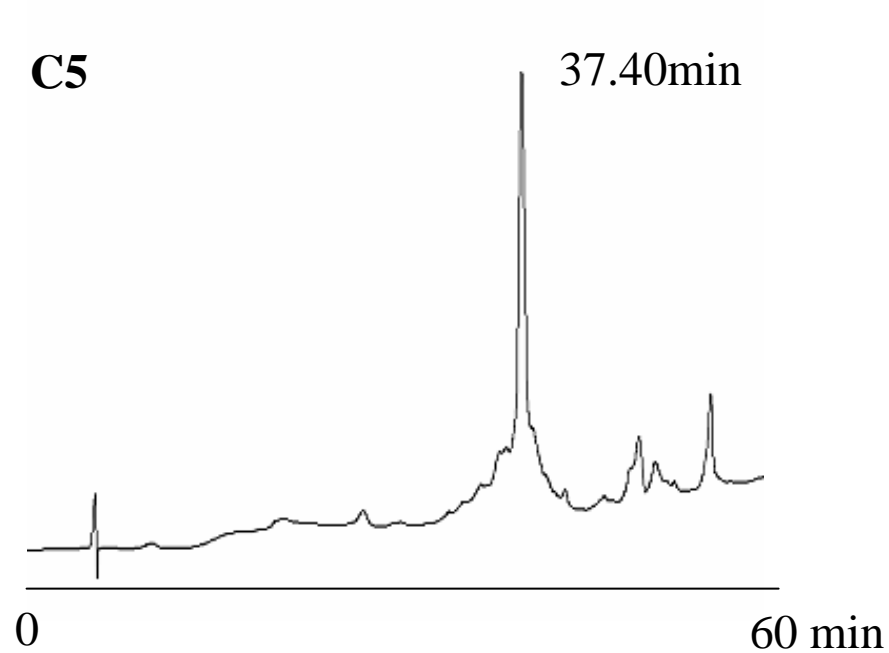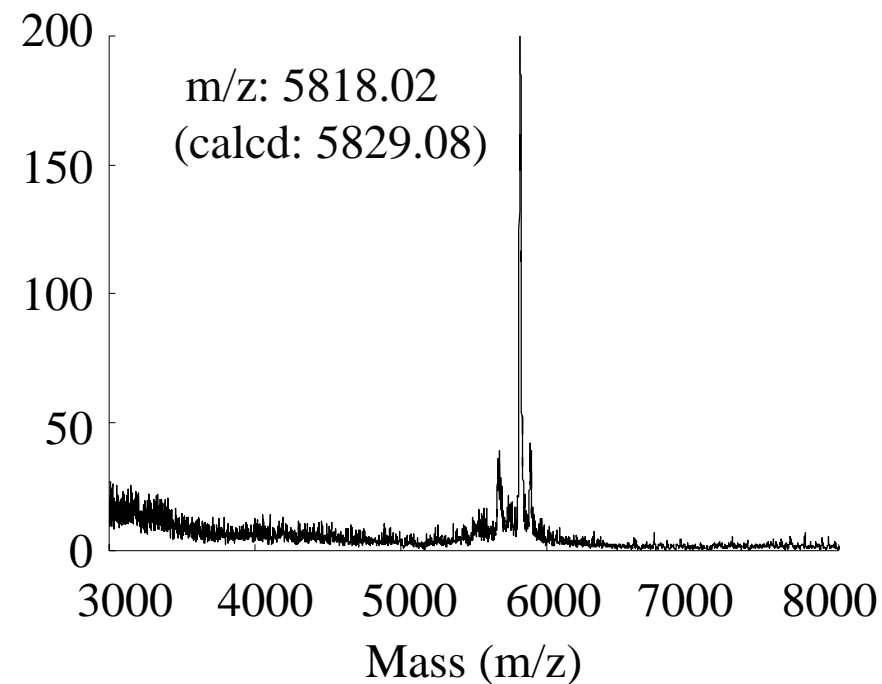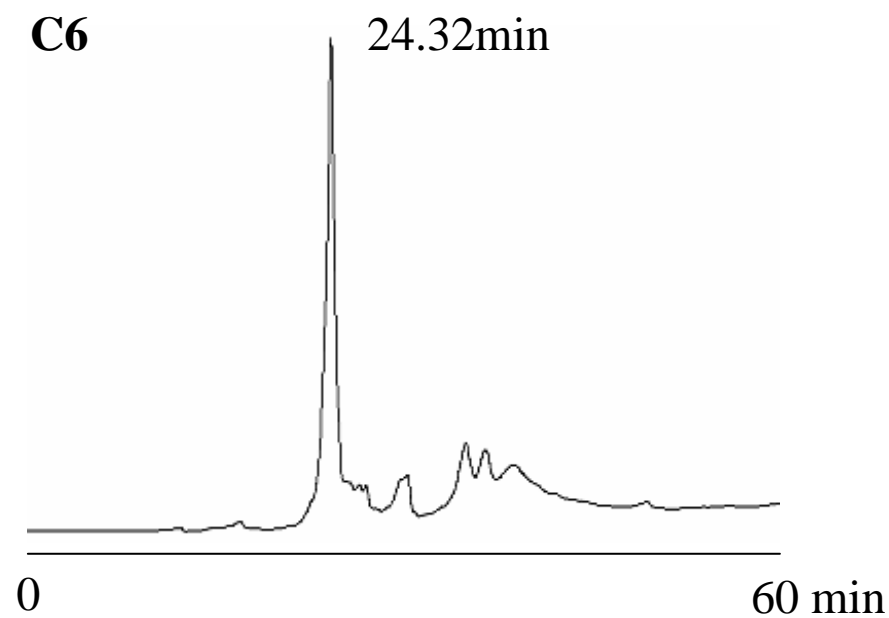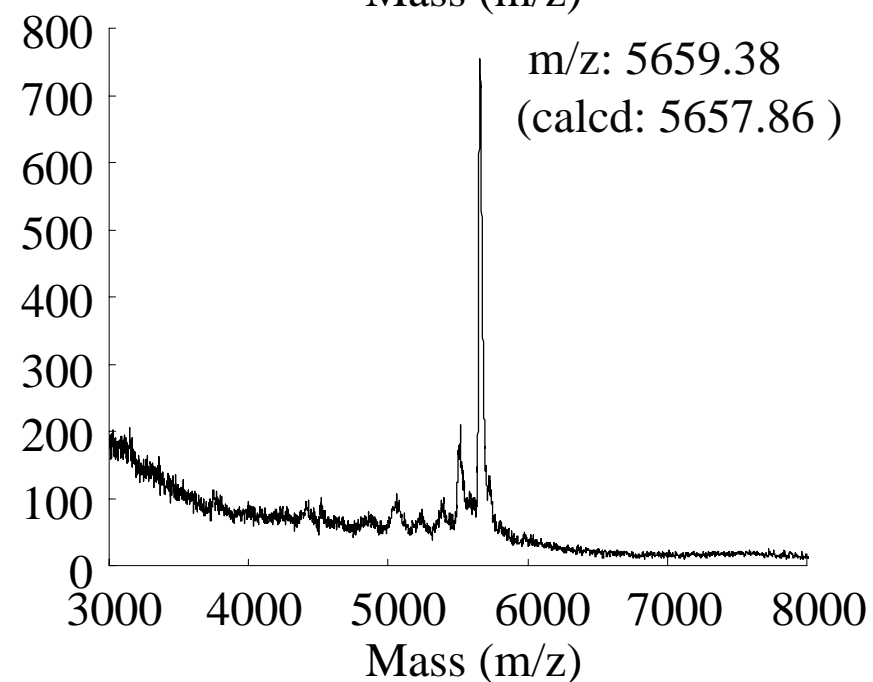

**Fig. 1c. Characterization of Conjugate ODNs (C5 and C6).**

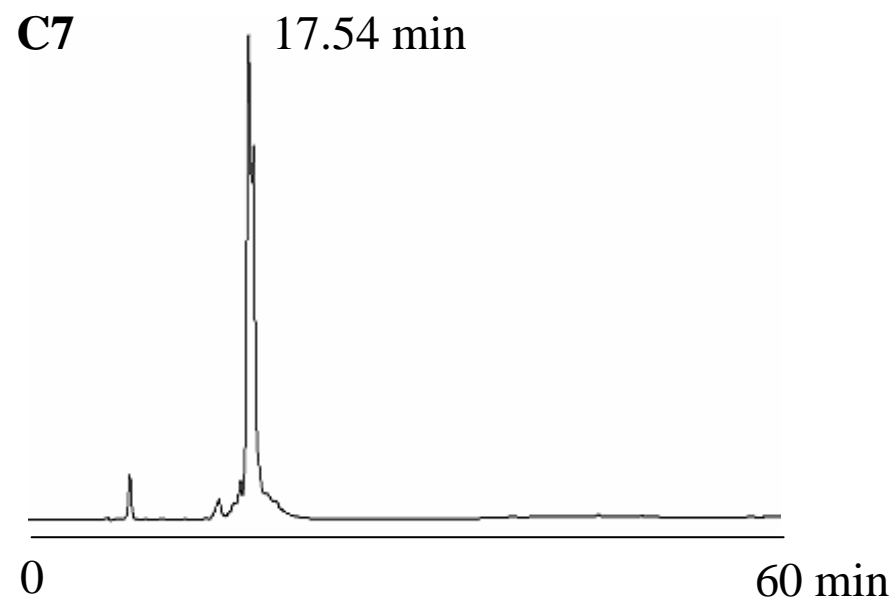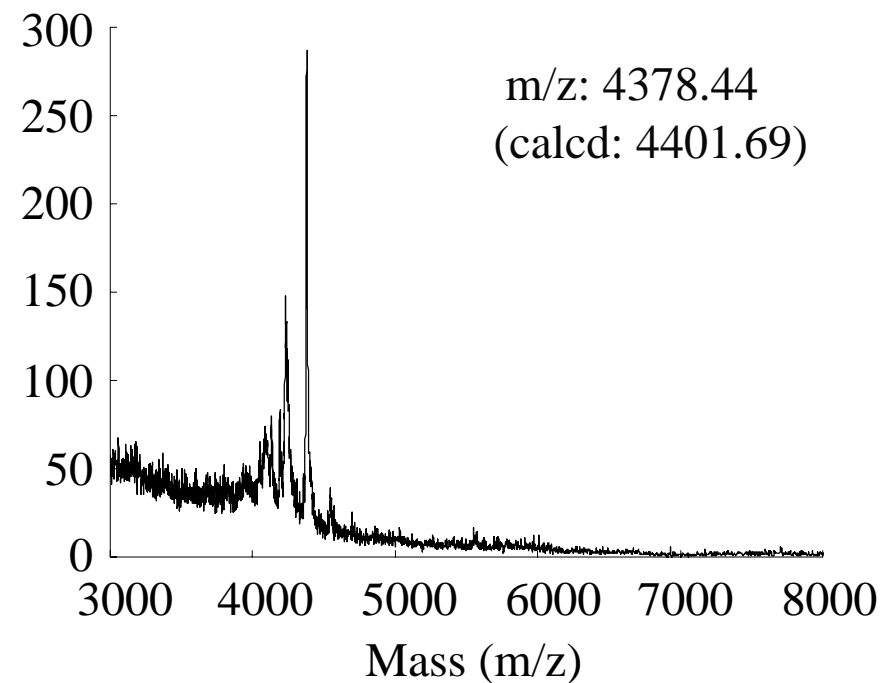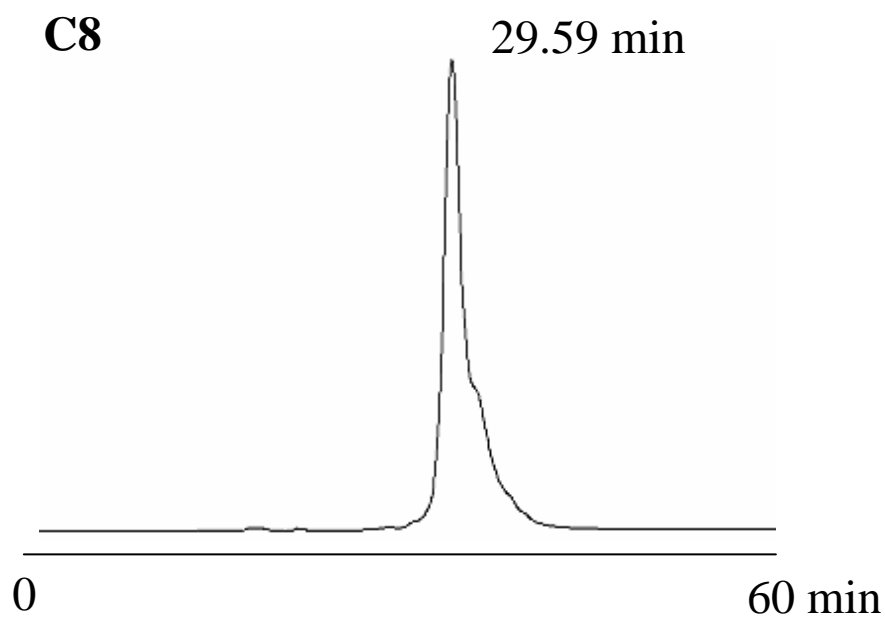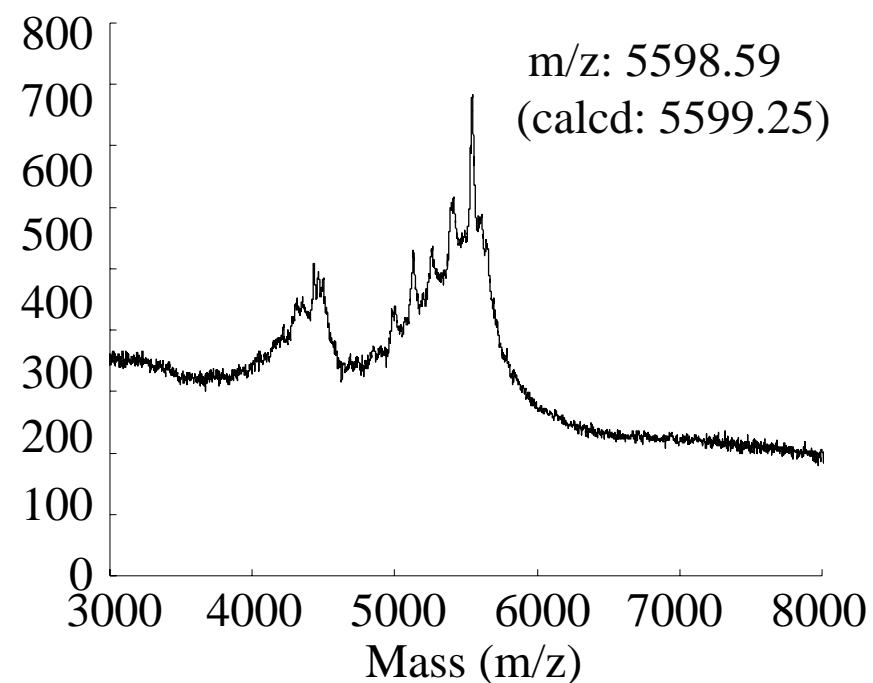

**Fig. 1d. Characterization of Conjugate ODNs (C7 and C8).**

**Table 1. Melting Temperatures of Conjugate ODN/ RNA**

| Duplex | Peptide / Sugar | Type       | Tm( )              |                    | Tm( )             |                   |
|--------|-----------------|------------|--------------------|--------------------|-------------------|-------------------|
|        |                 |            | + Mg <sup>2+</sup> | - Mg <sup>2+</sup> | +Mg <sup>2+</sup> | -Mg <sup>2+</sup> |
| R1/N1  | -----           |            | 44.00              | 37.50              | -----             | -----             |
| R1/C1  | SV40 T antigen  | (NLS)      | 44.00              | 40.00              | ± 0.00            | +2.50             |
| R1/C2  | HIV-1 Tat       | (NLS)      | 45.00              | 40.50              | +1.00             | +3.00             |
| R1/C3  | Influenza virus | (NLS)      | 43.00              | 39.00              | -1.00             | +1.50             |
| R1/C4  | HIV-1 Rev       | (NES)      | 44.00              | 39.00              | ± 0.00            | +1.50             |
| R1/C5  | α-helix         | Engineered | 44.50              | 41.50              | +0.50             | +4.00             |
| R1/C7  | Galactosamine   | Sugar      | 45.00              | 39.50              | +1.00             | +2.00             |
| R1/S1  | -----           |            | 36.50              | 32.00              | -----             | -----             |
| R1/C8  | SV40 T antigen  | (NLS)      | 37.50              | 32.50              | +1.00             | +0.50             |

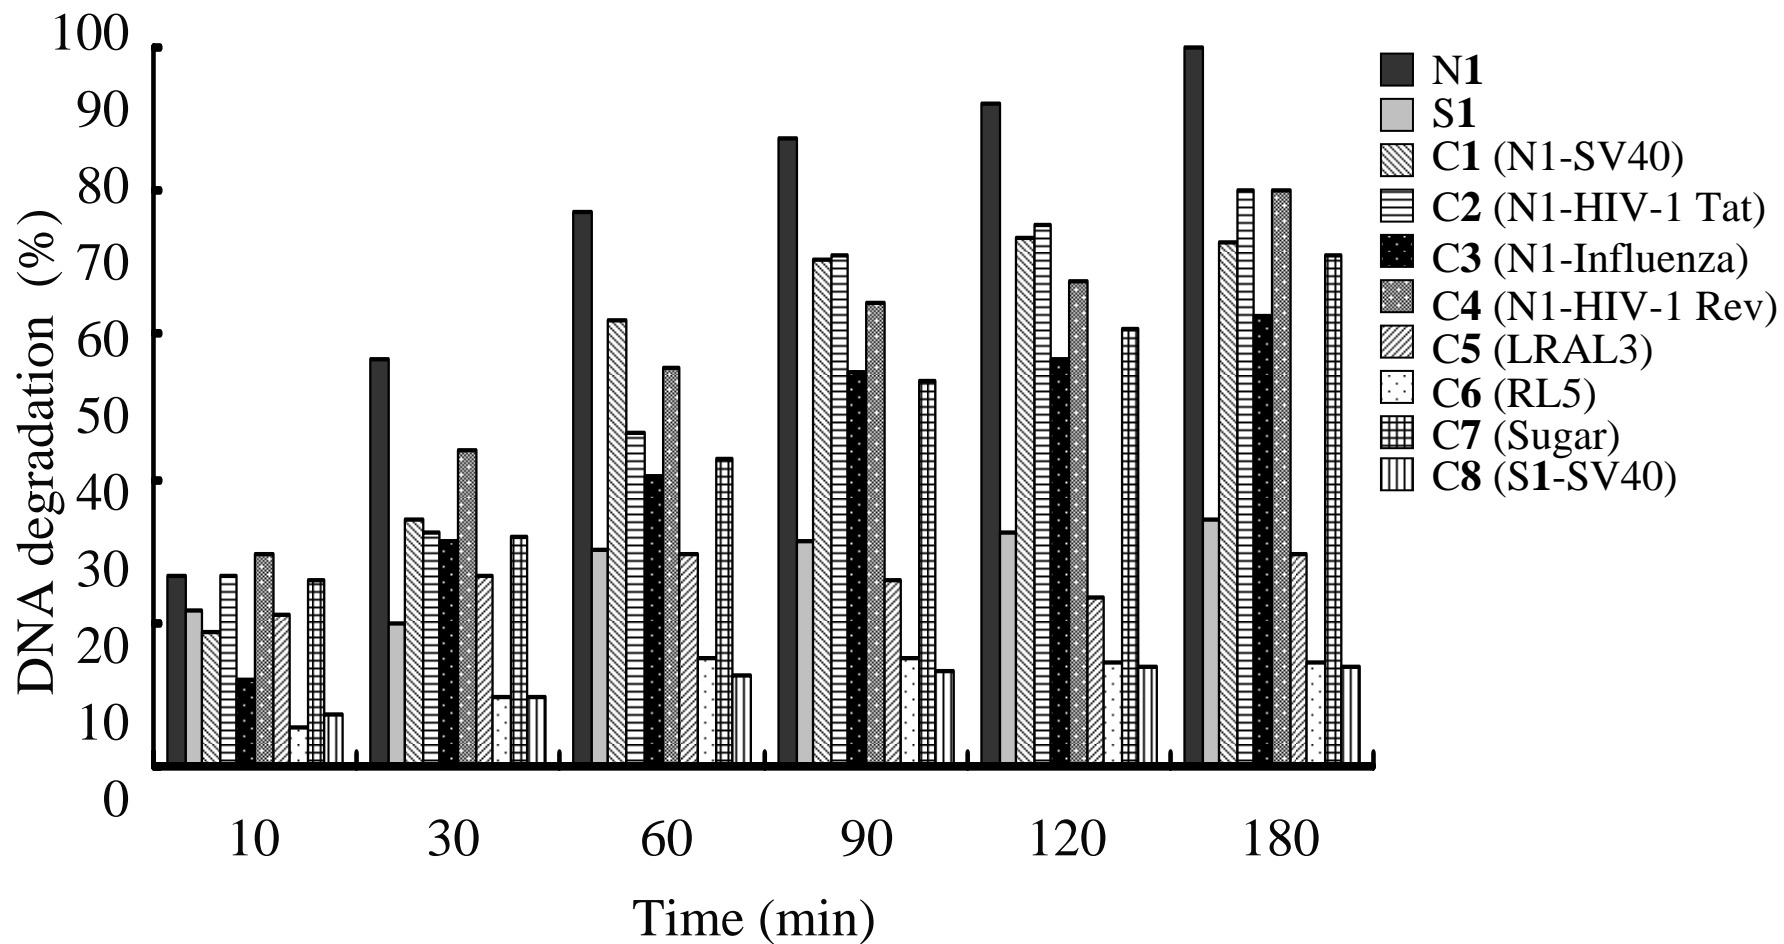

Conditions; [conjugate DNA] = 1 $\mu$ M, [DNase 1] = 100 unit, incubated for 0min, 5min, 10min, 20min, 30min, 45min, 60min, 90min, 120min and 180min at 37 $^{\circ}$ C, analyzed by RP-HPLC.

**Fig. 2. Resistance Against DNase 1 Digestion of Conjugate ODNs.**

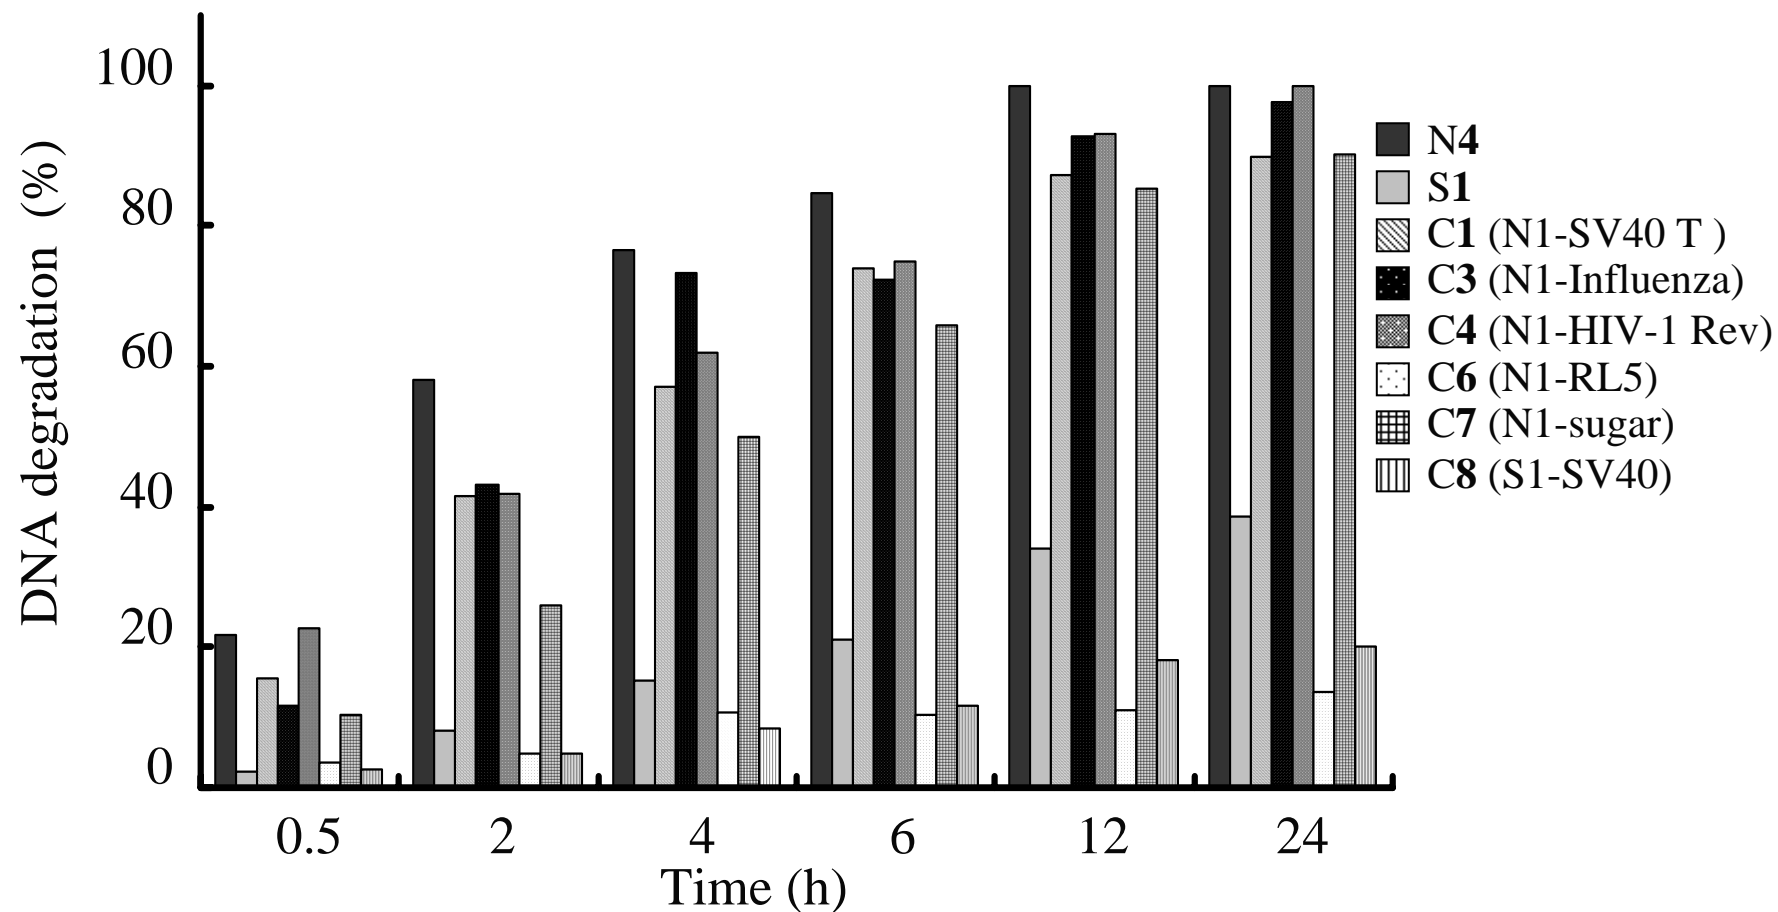

Conditions; DNA or conjugate (1 $\mu$ M) with 10% fetal bovine serum (FBS) were incubated for 0 h, 0.5 h, 1 h, 2 h, 4 h, 6 h, 12 h and 24h at 37°C. DNA degradations were analyzed by RP-HPLC.

**Fig. 3 Degradation of Conjugate ODNs in 10% Serum.**

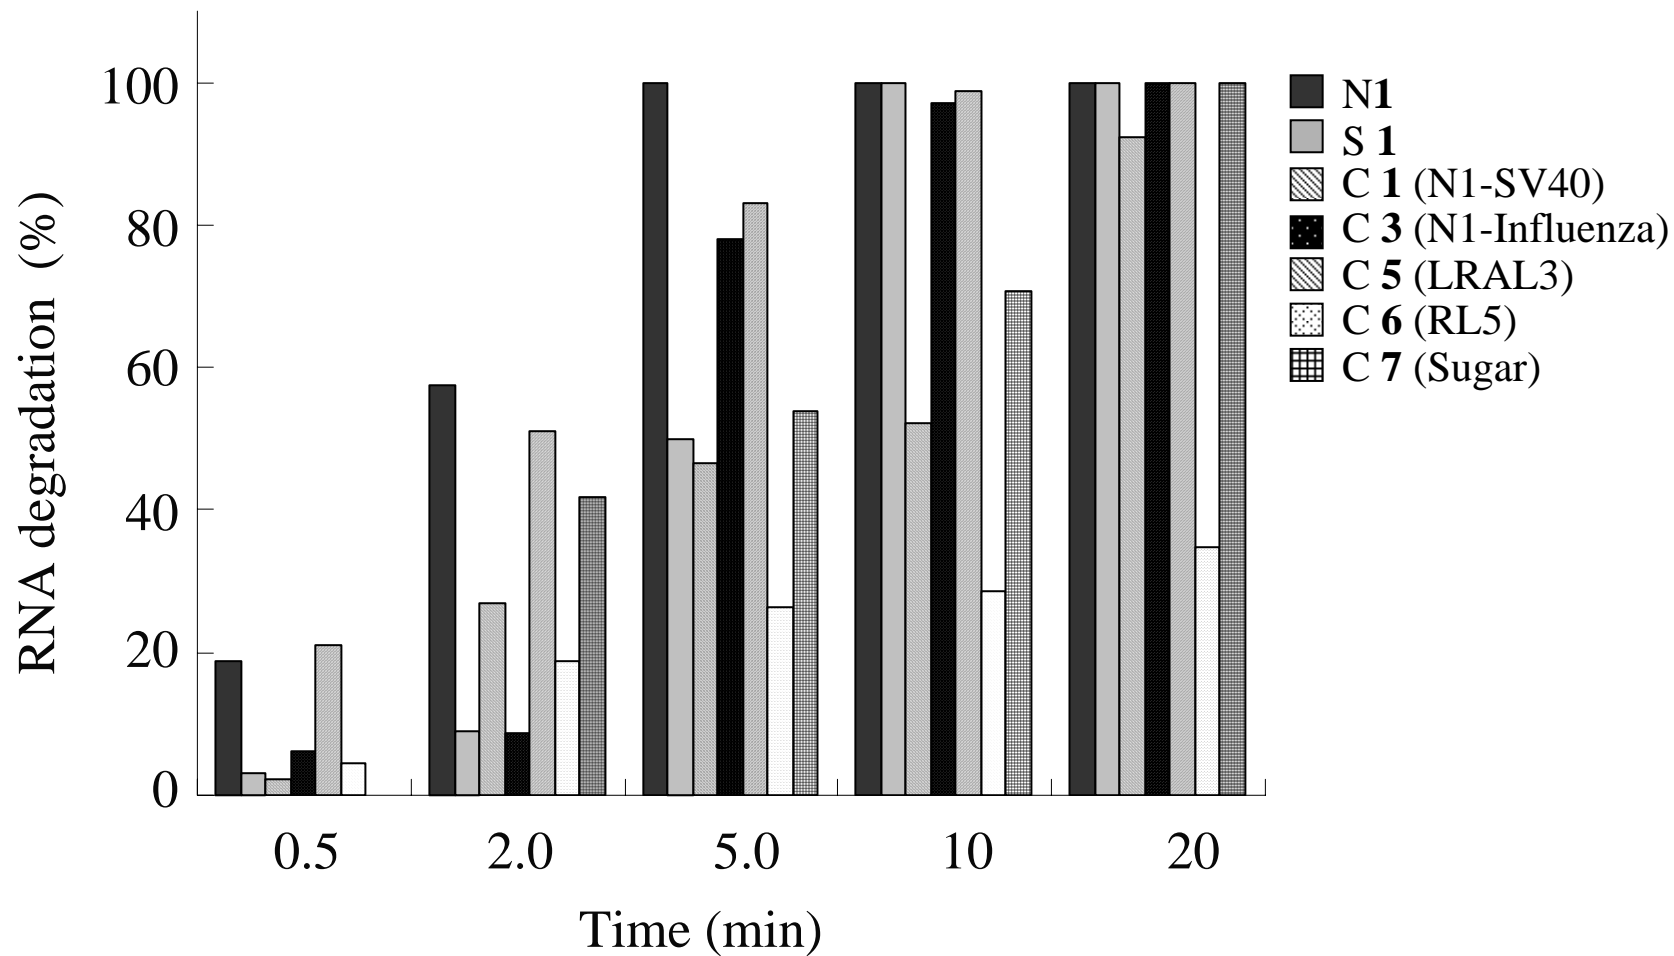

**Fig. 4. RNase H activity of Conjugate ODNs and RNA Complex**



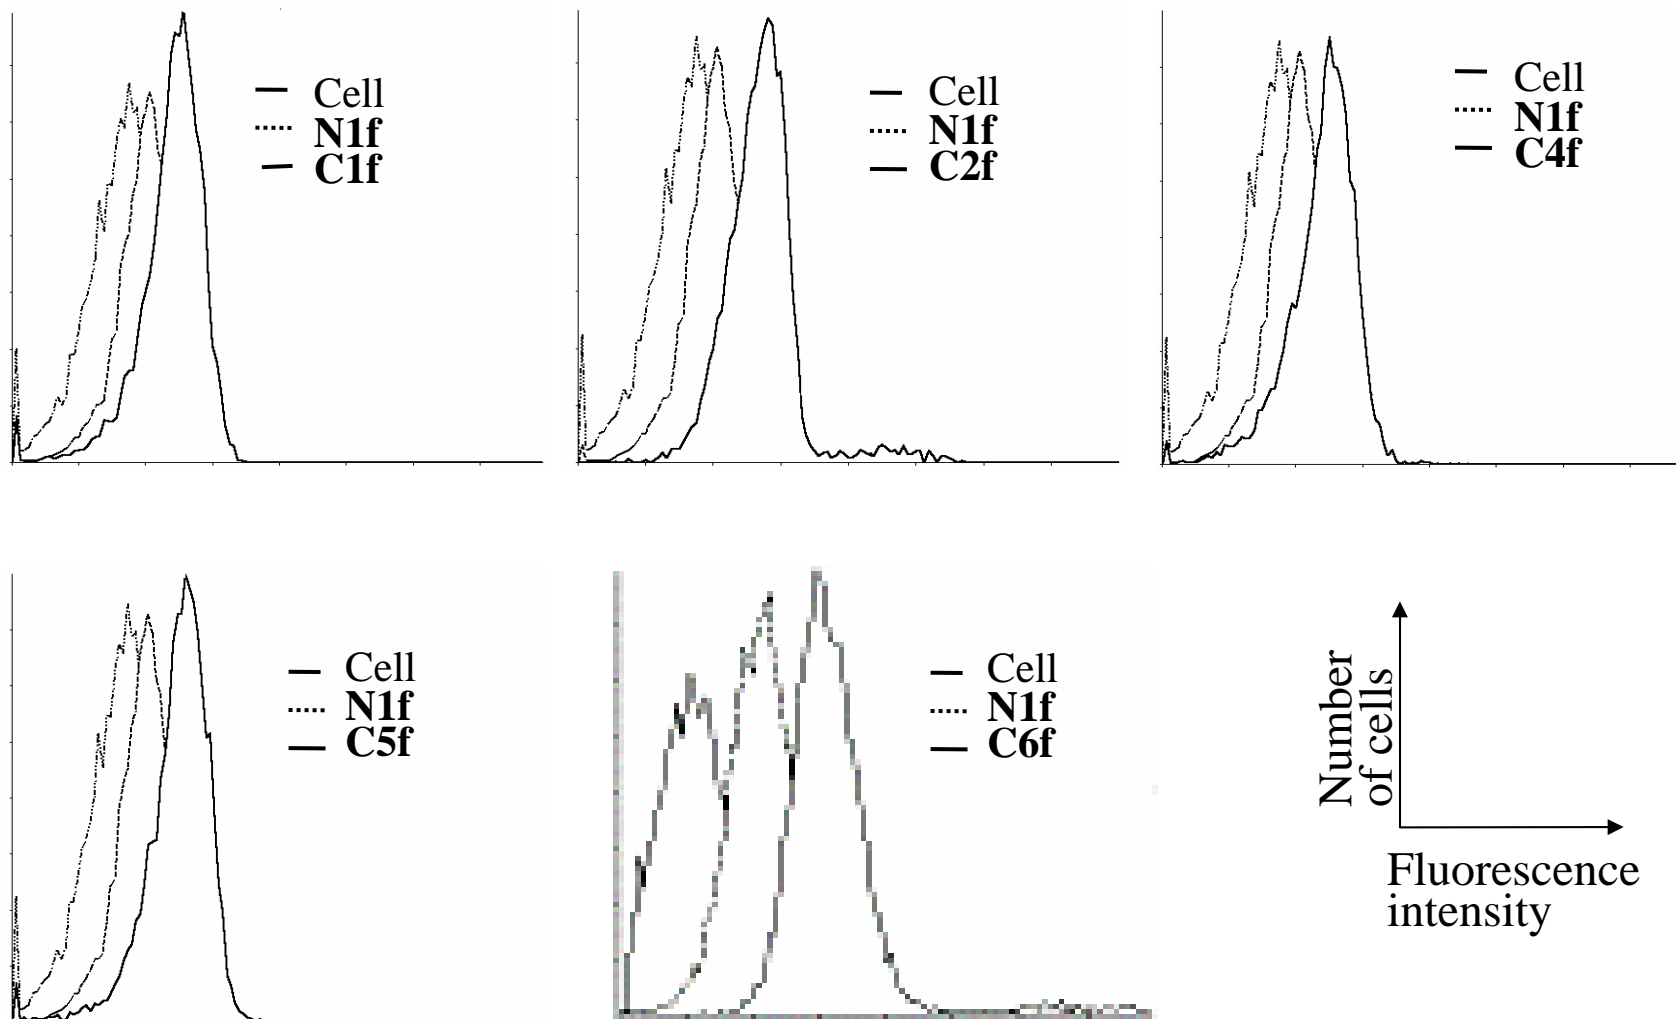

**Fig. 5. Membrane Permeability of Conjugate ODNs Detected by Flow Cytometry.**

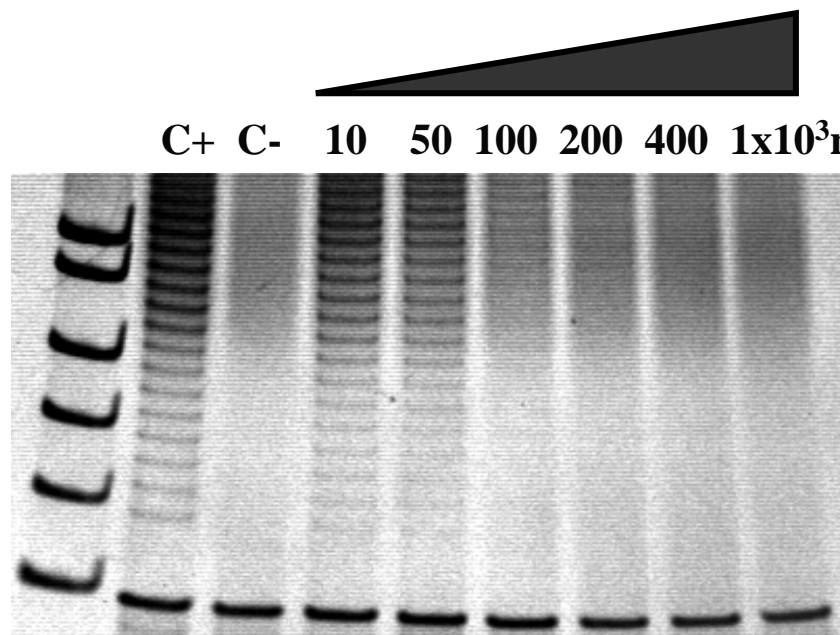

Conditions: cellular extract (Jurkat) =  $0.5 \times 10^6$  cells/ml, C+, positive control; C-, negative control; line2-6, conjugate AS (10, 50, 100, 200 and 400 nM) were incubated for 10 min at r.t., telomerase reaction was performed for 30 min at 30 °C.

| ODN (nM) | Structures             | IC <sub>50</sub> |
|----------|------------------------|------------------|
| N1       | -----                  | 1030             |
| S1       | -----                  | 25               |
| C1       | N1-SV40 (NLS)          | 55               |
| C2       | N1-HIV-1 Tat (NLS)     | 65               |
| C3       | N1-Influenza (NLS)     | 60               |
| C4       | N1-HIV-1 Rev (NES)     | 98               |
| C5       | N1-(LRLA) <sub>3</sub> | 65               |
| C6       | N1-(RL) <sub>5</sub>   | 155              |
| C7       | N1-Galactosamine       | 115              |
| C8       | S1-SV40 (NLS)          | 0.5              |

**Fig. 6. Inhibition of Telomerase Activity by Conjugate ODNs in Cell Lysate.**

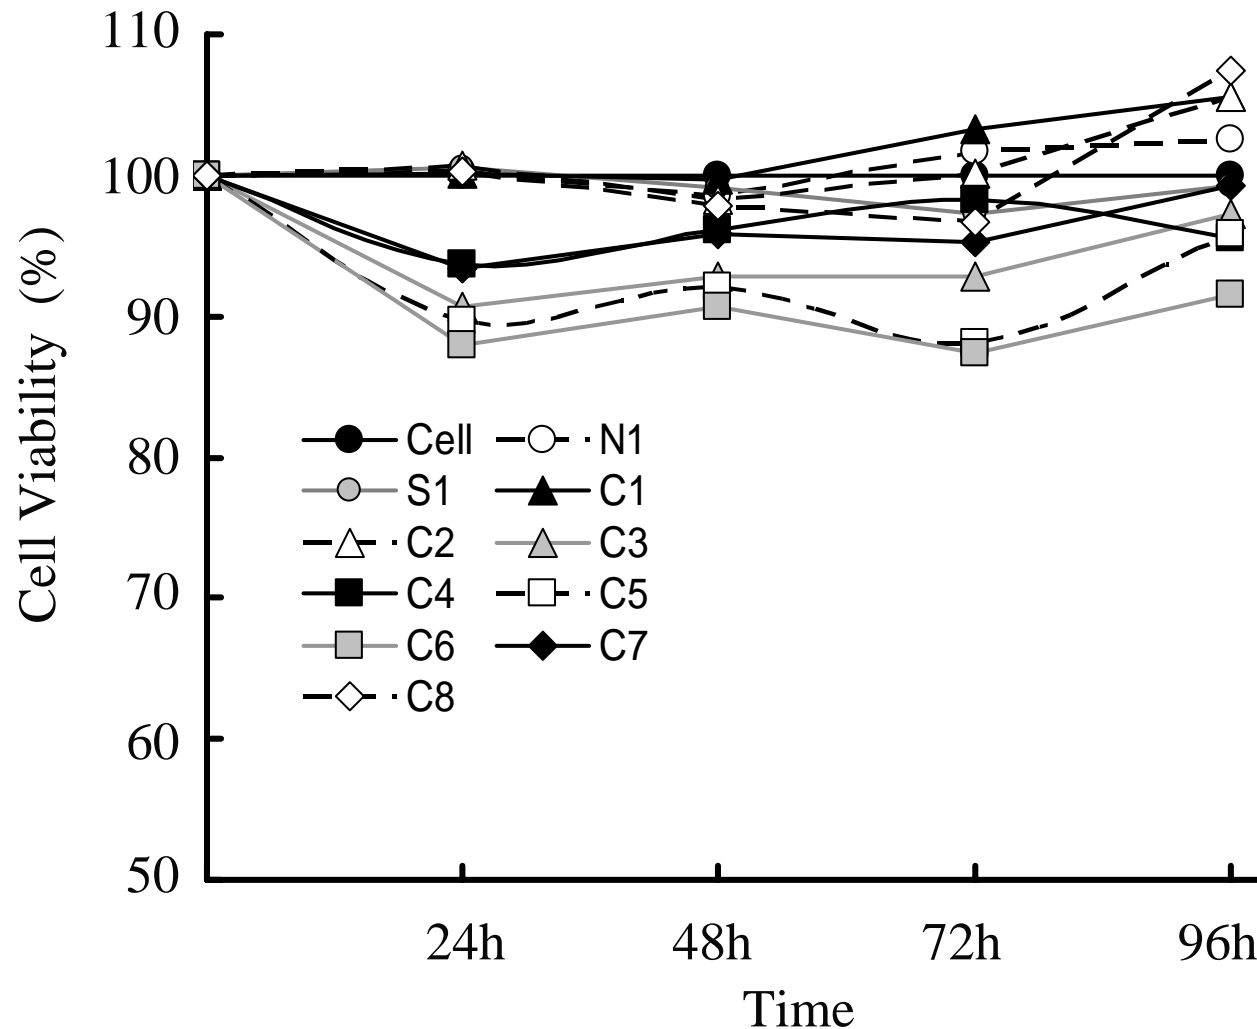

Reaction conditions: Conjugate ODN ( $5\mu\text{M}$ ) were incubated with Jurkat cell ( $0.5 \times 10^6$  cells/ ml) at  $37^\circ\text{C}$  under  $5\% \text{CO}_2$ . Cell viability was determined by a tripan blue stain and celltiter-Glo™ luminescent cell viability assay (Promega) which based on quantitation of the ATP in cells.

**Fig. 7. Cytotoxicity of Conjugate ODNs Against Jurkat Cell Line.**
